# Supplementary material for: Structural characterization of encapsulated ferritin provides insight into iron storage in bacterial nanocompartments
Source: PubMed Central journal article supplement (PMC5012862; doi:10.7554/elife.18972), 2016-08-16
Supplement: elife-18972-supp1.pdf [file elife-18972-supp1.pdf]

## Supplementary file 1. Multiple sequence alignment

BmBfr\_3FVB/1-182

1 10 20 30 40 50

MAHHHHHHM...GTLEAQTQGGPSMKGEPKVIERLNEALFL<sup>Q1</sup>ELGAVN.QYWLHYRLLN.DWGY

Rru\_A2195/1-159...MKGDPAIKRLNGVLKNEELTAIN.QYFLHARMLQ.NWGL

EcBfr\_3E1J/1-158...MKGDTKVINYLKLLGNELVAIN.QYFLHARMFQ.NWGL

EcBfr\_1BFR/1-158...MKGDTKVINYLKLLGNELVAIN.QYFLHARMFQ.NWGL

S7J5C3/1-158...MKGDPPIIQHLNKILGNELIAIN.QYFLHARMYK.DWGL

A0A0Q2MUZ5/1-158...MKGDPPIIQHLNKILGNELIAIN.QYFLHARMYK.DWGL

Q21HY7/1-157...MKGDPKVIKALGNELVAIN.QYFLHARMYK.DWGL

A0A0F7M3H2/1-159...MKGDPQVIAHLNKALGNELVAIN.QYFLHARMYK.DWGL

A0A0P1J4Y2/1-159...MKGDKKVIKALGNELVAIN.QYFLHARMYK.DWGL

A0A0C5VE25/1-156...MKGDAKVIQYLVNDELVAIN.QYFLHARMYK.NWGL

A0A0J6N4T8/1-158...MQGDKKVIKALGNELVAIN.QYFLHARMYK.NWGL

A0A0B7DEZ0/1-157...MKGDIQVIAHLNKALGNELVAIN.QYFLHARMYK.DWGL

AvBfr\_1SOF/1-156...MKGDKVIQHLNKILGNELIAIN.QYFLHARMYK.DWGL

ClDQU9/1-156...MKGDKVIQHLNKILGNELIAIN.QYFLHARMYK.DWGL

A0A0C2S8V2/1-156...MKGDKLVIQHLNKILGNELVAIN.QYFLHARMYK.DWGL

PaFtn\_3R2M/1-154...MQGHPEVIDYLNLTLLTGELARD.QYFLHARMYK.DWGF

Rru\_A3474/1-161...MKGNAAI LAELNLTLLAYEMTASD.QYFVHAHVVK.DLGL

FmFtn\_4ITW/1-168...GSEELDLFNQVTOEFTASQ.VYLSASIWHDQNDW...

MsLf\_1H96/1-182...TSQIRQNYSTEVEAAVNRVNLHLRASY.TYLSLGFYFDRDDVAL

Q5R538/1-175...MSSQIRQNYSTEVEAAVNSLVNMYLQASY.TYLSLGFYFDRDDVAL

G3R8I9/1-175...MSSQIRQNYSTEVEAAVNSLVNMYLQASY.TYLSLGFYFDRDDVAL

HuLf\_2FG4/1-174...SSQIRQNYSTEVEAAVNSLVNMYLQASY.TYLSLGFYFDRDDVAL

E3VX58/1-175...MSSQIRQNYSTEVEAAVNRVNLHLRASY.TYLSLGFYFDRDDVAL

Q9JKM8/1-175...MSSQIRQNYSTEVEAAVNRVNLHLRASY.TYLSLGFYFDRDDVAL

L8KH0/1-175...MSSQIRQNYSTEVEAAVNRVNLHLRASY.TYLSLGFYFDRDDVAL

B6VQP1/1-175...MSSQIRQNYSTEVEAAVNRVNLHLRASY.TYLSLGFYFDRDDVAL

FgMF\_3RGD/1-176...MVSQVRQNYHSDCEAAVNRMLNELYASY.TYSSMYAFFDRDDVAL

Q6P8C6/1-176...MQSQVRQNYHSDCEAAVNRMLNELYASY.TYSSMYAFFDRDDVAL

P85837/1-174...MESQVRQNYHSDCEAAVNRMLNELYASY.TYSSMYAFFDRDDVAL

P49947/1-176...MESQVRQNYHSDCEAAVNRMLNELYASY.TYSSMYAFFDRDDVAL

HuMF\_1R03/1-182...PAAGPSRVQRNFHPDSEAINRQINLELYASY.VYLSMAYFSDRDDVAL

HuHF\_2FHA/1-183...MTTASTSQVRQNYHSDCEAAVNRMLNELYASY.VYLSMAYFSDRDDVAL

MsHF\_3WNW/1-212...GSHMASMTGGQMGSGMSTTASPSQVRQNYHSDCEAAVNRMLNELYASY.VYLSMAYFSDRDDVAL

FgFtn/1-160...MKISENVTKAINDIKAEEMWSSN.LYLSMSSWFC.QVGY

EcFtn\_1EUM/1-160...MLKPEMIEKLNQMNLELYSS.LYQMSAWCS.YHTF

CjFtn\_1KRQ/1-167...MLSKVVKLLNEQINKEMIAN.LYLSMSSWFC.YHTF

HpFtn\_3EGM/1-181...MGSSP.HHHHHSQDPMLSKDIKLLNEQVNRKEMSSN.LYLSMSSWFC.YHTF

FfFtn\_2JD7/1-174...MLSERMLKALNDQLNRELYSAY.LYFAMAAYFE.DLGL

A0A0C7P5L5/1-169...MVKREMTQFLEDAFAGEESQAHM.KYLIFADDAE.EKGL

A0A075WM99/1-170...MVKKQMTKRFLEDAFAGEESQAHM.RYMFADVAE.NEGY

F8AEI6/1-171...MAVQDMTKKFLLEAFAGEESMAHM.KYLIFAEQAE.KEGF

A0A100XZC0/1-171...MVKKQMTKRFLEDAFAGEESMAHM.KYLIFAEQAE.KEGY

Q5JF11/1-171...MVKKQMTKRFLEDAFAGEESMAHM.KYLIFAEQAE.KEGY

Q9V0A0/1-175...MVKKQMTKRFLEDAFAGEESMAHM.KYLIFAEQAE.KEGY

B9KAX2/1-176...MLGGGRMREMTKRFLEDAFAGEESMAHM.KYLIFAEQAE.KEGY

Ff\_ruberythrin\_3MPS/1-130...VVKRTMTKRFLEDAFAGEESMAHM.KYLIFAEQAE.KEGY

Dv\_ruberythrin\_1LKM/1-144...MKSLKGRTEKNILTAFAFAGEESQARN.RYNYFGQAK.QDGF

St\_sulerythrin\_1J30/1-144...MKDLKGTAKAENLKQGFAGEESMANR.RYLYFAKRA.D.EEGY

Bp\_ruberythrin\_4DI0/1-144...GPGSMAQLKGSKTEENLKAFAGEESQANR.RYLYFAKRA.D.EEGY

CjDps\_3KWO/1-152...SNAMSVTKQLLQMQADAHLLWVWFHNYHWNVKGK...QF

BbDPS\_1N1Q/1-149...MKTISIQLLVALLNRQVANVWVLYVKLHNFHWNVNGP...NF

A0A0MIQIG0/1-146...MSKQLTDIVNKQIANVSVLYIKLHNYHWNVNGP...QF

I0BUW7/1-146...MSQNLTEVLNTOQIANVSVLYIKLHNYHWNVNGP...QF

A0A132BNU7/1-145...MSEQLIQAVNKQVANVWVLYVKLHNYHWNVNGP...DF

Q65FU7/1-145...MSEKLLKATVNKQVANVWVLYVKLHNYHWNVNGP...DF

D5TXF7/1-147...MSTKTNVVEVLNKQVANVWVLYVKLHNYHWNVNGP...HF

A0A0NOY8R5/1-151...MTTQAVYDVLNKQVANVWVLYVKLHNYHWNVNGP...NF

LmDPS\_2IY4/1-156...MKTINSVDTKEFLNHQVANLVNFTVKIHOIHWYMRGR...NF

SsDps\_2XJM/1-165...QSPAE.IASFSPRPSLA.DSKAVLNQAVADLSVAHSILHQVHWYMRGR...GF

SsDps\_2UX1/1-165...IASFSPRPSLA.DSKAVLNQAVADLSVAHSILHQVHWYMRGR...GF

EcDps\_1L8H/1-167...MSTAKLVKS.KATNLLTTRNDVSDSEKKATVELLNQVIOFIDLSLITKQAHWNMRGA...NF

AtDps\_109R/1-162...TKNDPLSNKASTVIGILNESLASVIDLALVTKQAHWNMRGA...NF

MsDps\_1UVH/1-183...PGLSDKKASDVADLLQQLSTYNDLHLTLKHHVHWNVNGP...NF

Rru\_A1499/1-187...NTATPLLPNKSIKESLGEHLSSWALHQAQVTOALWASRDP...AQ

MsDps/1-161...MSARR.TESDIQGFHATPEFGNQLQKVLVDLIELSLQKQAHWNVNGP...NF

Rru\_A0333/1-158...MDG.LSIDIGTADKQAIAGELSLRLADTYTLTKLTHNYHWNVNGP...NF

Cp\_symerythrin\_3QHC/1-179...GLNYNQE.DFMGLDRFFQDAVSHNNTDANAASIEVMEYCDMCPYFAEIA.RSGQ

STAU\_4074/1-157...MAGSSDTELL.NDVAR.IRVLARLELITIN.EYEAFAISSH...NF

MXAN\_3557/1-164...MQGSI.PMAGPPDSDL.DDVAR.IRVLARLELITIN.EYEAFAIASN...NF

MXAN\_4464/1-116...MTDTELARSIRLNIEAELDAIN.LYAAHIDATDN...NF

MXAN\_2410/1-109...MAKNSNPSAFDRDFGYLMPFLD.RVAAAASDLD...NF

Cthe\_1503/1-119...PFAGNVP.RKLTKEELIQAIRLNIAAGLEAIF.VYDAHVQATDD...NF

Tlet\_1919/1-116...PFGSGVDPDRKLSLSELIRAIRLNIAAHEAVH.LYMAHADATDD...NF

Mboo\_1094/1-124...PFGSGVDPDRKLSLSELIRAIRLNIAAHEAVH.LYMAHADATDN...NF

PF1192/1-96...P.TLINRDKPYTKHEELMELRLAIIAELDAIN.LYEQMAYSED...NF

PFC\_05175short/1-99...P.TLINRDKPYTKHEELMELRLAIIAELDAIN.LYEQMAYSED...NF

Hoch\_3836/1-131...MGLSIN.P.TLINRDKPYTKHEELMELRLAIIAELDAIN.LYEQMAYSED...NF

Rru\_A0973/1-140...MSSEQ.LHEPAELLSSETKMNHRAL.VTLIELEAVD.WYQQRADACSE...NF

FRAL4504/1-136...MAQSSN.STHEPLEVLKKEETVNRHRAI.VSVMELEAVD.WYDQRVDASTD...NF

Sce5279/1-127...MGDSSM.LHEQPDKLSAQTVDRHRAI.VSLMELEAVD.WYDQRVDASTD...NF

WS0286/1-124...MSSNEG.YHEPPELLSEATKERRHRAI.VSLIELEAVD.WYQQRADACSD...NF

Amet\_4422/1-120...MVHEG.AKEAAERLPEEVVDYHRII.QSTIELEAVD.LYQQRAAATKD...NF

Hore\_15960/1-115...MAMD.YHEPVENLDEKTKNITRAI.NSLKEIEAVD.WYQQRVAASND...NF

Tpet\_0143/1-114...MANT.YHE.ENLPEAREFERMI.RSVIELEAVD.WYQQRVAATND...NF

Tmari\_0787/1-114...MADQ.YHEPVELTGDKDRDFVRAL.NSLKEIEAVA.WYHQRVVTKD...NF

Tbd\_2465/1-100...MADQ.YHEPVELTGDKDRDFVRAL.NSLKEIEAVA.WYHQRVVTKD...NF

Achr\_1378/1-102...MSSVG.YHEPIGELSDETRDMHRAI.VSLMELEAVD.WYQQRADACKD...NF

FG1C\_13910/1-99...MSSVG.YHEPSELSAETRMHRAI.VSLMELEAVD.WYQQRVADCKD...NF

Tgr\_0837/1-101...MSSVG.YHEPVEELSDETRDMHRAI.VSLMELEAVD.WYQQRADACKD...NF

CYCMC\_0127/1-95...MSNEG.YHEPVEELSDETRDMHRAI.VSLMELEAVD.WYQQRVADACKD...NF

Q91\_0125/1-95...MSNEG.YHEPVEELSDETRDMHRAI.VSLMELEAVD.WYQQRVADACKD...NF

Nmul\_A2196/1-96...MANEG.YHEPVEELSDETRDMHRAI.VSLMELEAVD.WYQQRVADACKD...NF

cce\_0034/1-96...MSNEG.YHEPVEELSDETRDMHRAI.VSLMELEAVD.WYQQRVADACKD...NF

Metme\_0971/1-95...MANEG.YHEPVEELSDETRDMHRAI.VSLMELEAVD.WYQQRVADACKD...NF

MEALZ\_1148/1-94...MANEG.YHEPVEELSDETRDMHRAI.VSLMELEAVD.WYQQRVADACKD...NF

AAZ24\_01205/1-95...MASEG.YHEPVEELSDETRDMHRAI.VSLMELEAVD.WYQQRVADACKD...NF

IMC21906\_01077/1-95...MSNEG.YHEPVEELSDETRDMHRAI.VSLMELEAVD.WYQQRVADACKD...NF

Sta7437\_0684/1-95...MSNEG.YHEPVEELSDETRDMHRAI.VSLMELEAVD.WYQQRVADACKD...NF

GU3\_08795/1-95...MANEG.YHEPVEELSDETRDMHRAI.VSLMELEAVD.WYQQRVADACKD...NF

MARPU\_03990/1-95...MSSVG.YHEPVEELSDETRDMHRAI.VSLMELEAVD.WYQQRVADACKD...NF

Thivi\_3051/1-95...MANEG.YHEPVEELSDETRDMHRAI.VSLMELEAVD.WYQQRVADACKD...NF

THI1\_2135/1-95...MANEG.YHEPVEELSDETRDMHRAI.VSLMELEAVD.WYQQRVADACKD...NF

NE0167/1-95...MANDG.YHEPVEELSDETRDMHRAI.VSLMELEAVD.WYQQRVADACKD...NF

Kkor\_0109/1-94...MSNEG.YHEPVEELSDETRDMHRAI.VSLMELEAVD.WYQQRVADACKD...NF

M911\_12845/1-94...MANEG.YHEPVEELSDETRDMHRAI.VSLMELEAVD.WYQQRVADACKD...NF

consensus>70

e a y

Q1

E31A E34 E32 Y39

BmBfr\_3FVB/1-182

60 70 80 90 100 110  
 TRLAKKERKESIEEMHADKLIIDRIIFLEGFNPLQTVSPLRIG . . . . . QNVKEVLEAD  
 TRLGKREFKESIEEMHADKLIKRVLFLEGLPNLQDLGKLRIG . . . . . ETVREVLEND  
 KRLNDVEYHESIDEMKHADRYIERILFLEGLPNLQDLGKLNIG . . . . . EDVEEMLRSD  
 KRLNDVEYHESIDEMKHADRYIERILFLEGLPNLQDLGKLNIG . . . . . EDVEEMLRSD  
 KHLADKEYHESIDEMKHADHLIERILFLEGLPNLQDLGKLMIG . . . . . EDTKEMLECD  
 A0A0Q2MUZ5/1-158 KHLADKEYHESIDEMKHADHLIERILFLEGLPNLQDLGKLMIG . . . . . EDTKEMLECD  
 Q21HY7/1-157 KELADHEYEHESIDEMKHADQLIERILFLEGLPNLQSLGKLLIG . . . . . ENTKEMLECD  
 KELADVEYHESIDEMKHADQLIERILFLEGLPNLQDLGKLMIG . . . . . ENTKEMLECD  
 A0A0F7M3H2/1-159 HALYEKEYHESIDEMKHADWLIERILFLEGVNPLQDLGKLMIG . . . . . ENTKEMLECD  
 A0A0P1J4Y2/1-159 HALYEKEYHESIDEMKHADWLIERILFLEGVNPLQDLGKLMIG . . . . . ENTKEMLECD  
 A0A0C5VEZ5/1-156 EKLKGKEYHESIDEMKHADKLLERILFLEGVNPLQDLGKLLIG . . . . . ENTKEMLECD  
 A0A0J6N4T8/1-158 KKLNEHEYHESIDEMKHADALIERVLFLEGLPNLQDLGKLLIG . . . . . ENTKEMLECD  
 A0A0B7DEZ0/1-157 NKLKGKEYHESIDEMKHADKLIKRILFLEGLPNVQDLGKLLIG . . . . . ENTKEMLECD  
 AvBfr\_1SOF/1-156 EKLKGKEYHESIDEMKHADKLIKRILFLEGLPNLQDLGKLLIG . . . . . EHTKEMLECD  
 C1DQ9/1-156 EKLKGKEYHESIDEMKHADKLIKRILFLEGLPNLQDLGKLLIG . . . . . EHTKEMLECD  
 A0A0C2S8V2/1-156 SRLGKHEYHESIDEMKHADKLIKRILFLEGLPNLQDLGKLLIG . . . . . ENTREMLECD  
 PafTn\_3R2M/1-154 SKLYERLNHEMEETTHADALLRILLLEGTPRM.RPDDIHPGTT . . . . . VPEMLEAD  
 Rru\_A3474/1-161 PRLHARIKHEQEELLEHARVLIERILFLEGTPLDQRPPTSTRH . . . . . VPEMLALD  
 FmFtn\_4ITW/1-168 EGMAYMVAESAERERHGLGFVDFANKRNIPTELQAVFAPVSCAEW . . . . . SSEPDVWQSI  
 MsLF\_1H96/1-182 EGVGHFFRELAEKREGEERLLEFQNRGGRALFDVQKPSQDEW . . . . . GKTQAEAMEAA  
 Q5R538/1-175 EGVSHFFRELAEKREGEYERLLKMQNRGGRALFDIKKPAEDEW . . . . . GKTPDAMKAA  
 G3R819/1-175 EGVSHFFRELAEKREGEYERLLKMQNRGGRALFDIKKPAEDEW . . . . . GKTPDAMKAA  
 HuLF\_2FG4/1-174 EGVSHFFRELAEKREGEYERLLKMQNRGGRALFDIKKPAEDEW . . . . . GKTPDAMKAA  
 E3VX58/1-175 AGVGHFFRELAEKREGEARLLEFQNRGGRALFDVQKPSQDEW . . . . . GKTLDAMEAA  
 Q9JKM8/1-175 AGVGHFFRELAEKREGEARLLEFQNRGGRALFDVQKPSQDEW . . . . . GKTLDAMEAA  
 L81KH0/1-175 EGVGHFFRELAEKREGEARLLEFQNRGGRALFDVQKPSQDEW . . . . . GKTLDAMEAA  
 B6VQP1/1-175 EGVSHFFRELAEKREGEARLLEFQNRGGRALFDVQKPSQDEW . . . . . GKTQDAMEAA  
 FgMF\_3RGD/1-176 HNVAEFFKESHSEEREHAKFKMYQNRKGGRVLQDIKKPERDEW . . . . . GNTLEAMQAA  
 Q6R8C6/1-176 HHVAKFFKESHSEEREHAKFKMYQNRKGGRVLQDIKKPERDEW . . . . . GNTLEAMQAA  
 P85837/1-174 PGFAHFFKQSEEREHAKKLMQNRGGRALFDVQKPSQDEW . . . . . GSGLDLACA  
 P49947/1-176 PGFAHFFKQSEEREHAKKLMQNRGGRALFDVQKPSQDEW . . . . . GSGLDLACA  
 HuMF\_1R03/1-182 NNFSRYFLHQSREEREHAKKLLRFQNRGGRIQLQDIKKPERDDW . . . . . ENGLEAMQCA  
 HuHF\_2FHA/1-183 KNFAKYFLHQSREEREHAKKLMQNRGGRIQLQDIKKPERDDW . . . . . ESSLNAMECA  
 MsHF\_3WNW/1-212 KNFAKYFLHQSREEREHAKKLMQNRGGRIQLQDIKKPERDDW . . . . . ESSLNAMECA  
 PgfTn/1-160 NGFAHWLKKQSLERERHAYDMMQYLLKRGGEVKIEADAVPKF . . . . . GSVLEVPQV  
 EcFtn\_1EUM/1-160 EGAAFLRRHAQEMTHQRLFLDYLTDGTLNPRINTVESPFAEY . . . . . SSIDLEPET  
 CfTn\_1KRQ/1-167 DGAGALFLAHASERESDHAKKLIYLYNLESHVLEQVQKQPNF . . . . . EGLLDVFEKT  
 HpFtn\_3EGM/1-181 DGAGALFLAHASERESDHAKKLIYLYNLESHVLEQVQKQPNF . . . . . EGLTQIFPKA  
 PffTn\_2J07/1-174 DGFAWNMKAQAEERIEGHARLFYNYIDRNGRVELDEIPKPPKEW . . . . . ESPLKAMEAA  
 A0A0C7P515/1-169 KNLARMWRATAYAEVYHARNHFKALGHLG . . . . . STQDNLQOS  
 A0A075MM99/1-170 PNIAKLFRATAYAEVYHARNHFKALGHLG . . . . . STVDNLQOS  
 F8AEI6/1-171 PNIAKLFRATAYAEVYHARNHFKALGHLG . . . . . KTFENLQAG  
 A0A100XZC0/1-171 PNIAKLFRATAYAEVYHARNHFKALGHLG . . . . . KTFENLQAG  
 Q5UF11/1-171 HNIAKLFRATAYAEVYHARNHFKALGHLG . . . . . KTFENLQAG  
 Q9V0A0/1-175 PNIAKLFRATAYAEVYHARNHFKALGHLG . . . . . KTFENLQAG  
 B9KAX2/1-176 KLANLFRATAYAEVYHARNHFKALGHLG . . . . . R.MAENVOQC  
 Pf\_rubrerythrin\_3MPS/1-130 PNIAKLFRATAYAEVYHARNHFKALGHLG . . . . . KTFENLQAG  
 Dv\_rubrerythrin\_1LKM/1-144 VOISDIFAETADQEREHAKKRLFKLEGGDLAIVA.AFPAGII . . . . . ADTHANLIAS  
 ST\_sulerythrin\_1J30/1-144 PEIAGLLRSIAEGETAHAFGHLDIFQGGGLTDFATDKPI . . . . . GTEQMLESA  
 Bp\_rubrerythrin\_4DI0/1-144 NDIAALFRSTAEGETICHAHGHLEYLEAVG.DPATGLFF . . . . . GTSRQNLQSA  
 CjDps\_3KWO/1-152 FSIHEYTEKAYEEMAEFLDSCAERVLQGEKAITCQKVLMEKASPKVA . . . . . KDCFTPLEVLELI  
 BbDps\_1NIQ/1-147 FTLHEKFEELYTEASGHIDITLAEVRLSITGGSPATLAASLEASIKEA . . . . . TGGSAAEMVSSV  
 A0A0M1QIG6/1-146 FTLHEKFEELYTEAALHIDTLEAERLLALGGAPVATMKCELEQSSVREA . . . . . TGQETAEMVATI  
 IOBUW7/1-146 FTLHTKFEELYTEAALHIDTLEAERLLALGGAPVATMKCELEQSSVREA . . . . . NGGESAAEMVASI  
 A0A132BN07/1-145 FTLHEKFEELYTEATYIDDLAERLLALNGKPIATMKESLETSASVREA . . . . . NGNETAEMVQSI  
 Q65FU7/1-145 FTLHEKFEELYTEAALHIDTLEAERLLALGGSPVGTMKCELEASIKEA . . . . . DGSESAEMVQSN  
 D5TXF7/1-147 FTLHEKFEELYTEAGTYIDDLAERLLALGGKPLATMKELYLTSVSEGG . . . . . TSKESAAEMVQTL  
 A0A0NOY8R5/1-151 FELHKFFELYTEAAGYIDDLAERLLALGGKPVATMKELYLTSVSEGG . . . . . TGNETAEMVQNL  
 LmdDps\_2IY4/1-156 FTLHEKMDLYSEFGEQMDVEARLLAIGGSPFSTLKEFFENSQVEEAP . . . . . YTKPNTMDQLMEDL  
 SsDps\_2XJM/1-165 MIWHPKMDLYSEIDGYLDEMSERLITGGGAPFSTLKEFFENSQVEEAP . . . . . GDYNVTEEQRLARV  
 SsDps\_2UX1/1-165 MIWHPKMDLYSEIDGYLDEMSERLITGGGAPFSTLKEFFENSQVEEAP . . . . . GDYNVTEEQRLARV  
 EcDps\_1L8H/1-167 IAVHEMLDGFRTALICHLATMAERAVLGGVALGFTQVINSKTPKLSYP . . . . . LDINHVDHDLKEL  
 AtDps\_1O9R/1-162 IAVHEMLDGFRTALICHLATMAERAVLGGVALGFTQVINSKTPKLSYP . . . . . TDYKTHDHLDAL  
 MsDps\_1UVH/1-183 IGVHEMLDQVELVRGYADVAERIAITLGGSPKGTGAIIDRTWDDYS . . . . . VPDITVQAHLAAL  
 Rru\_A1499/1-187 IGLHRVLLVATLETISAHLSRITALGGDPRDLPQVEADRLFLFQ . . . . . FERPSIDRQLLAV  
 MsDps/1-161 RDLHLQDLDELVDFAREGSDTIAERMRALDAPVDRSDTVAATTTLPEFP . . . . . AFERSTADVVDLI  
 Rru\_A0333/1-158 NTLHLMFEQYIESTADVIAERIRALGYPAPGSYQYAKLTVIKEG . . . . . SGVPTAEEMIRDL  
 Cp\_symerythrin\_3QHC/1-179 PEIGAMFDATAKEGMHAQLTLTKLYSELVKDSAEITLAKRLVSTIESQIDAVASDSRGLRRALETA  
 STAU8\_4074/1-157 PEVRAFFHLAAEKEHVAEATQMLRMLD . . . . . SAQDGHFAQP  
 MXAN\_3557/1-164 PEVRAFFHLAAEKEHVAEATQMLRMLD . . . . . SGQNDHFAKP  
 MXAN\_4464/1-116 EDAKALQHVMDEREHALFWELIARLD . . . . . PEQAHAKEA  
 MXAN\_2410/1-109 ASARAELTRLMVKKARWQRIQELLGGAGG . . . . . RGAAPTPAREAP  
 Cthe\_1503/1-119 PVAKKVIADIRD EKAHVGEMLTLRYLD . . . . . PEAEHFAEG  
 Tlet\_1919/1-116 PLAKKVLIDIANERVHIGFTLLELIT . . . . . KDEAQYMESE  
 Mboo\_1094/1-124 ELAKAVLTDIANERVHIGFTLLELIT . . . . . GNDEQFYKKG  
 PFF1192/1-96 ENVRKILLDVAR EKAHVGEFMALLNLD . . . . . PEQVTEKGG  
 PFC\_05175short/1-99 ENVRKILLDVAR EKAHVGEFMALLNLD . . . . . PEQVTEKGG  
 Hoch\_3836/1-131 PGLHDVLIHKNKEVEHAMMTLEWIRRRS . . . . . PVFDHMRTY  
 Rru\_A0973/1-140 PELTATLHNRD EKEHAMMTLEWIRRRS . . . . . AKWAHHLRTY  
 FRAAL4504/1-136 PEAQVLAHNRD EKEHAMMTLEWIRRRS . . . . . PVLDTQLRTY  
 Sce5279/1-127 AELRAVLLHLE EVEHAMMNLEWIRRRS . . . . . RVFOEKLDYI  
 WS0286/1-124 PAVRAIMEHNRD EIEHAMVLEWIRRRS . . . . . PVWDETRMAL  
 Amet\_4422/1-120 EELKQIMAHNRD EIEHAMCMTLEWIRRRS . . . . . DGWDEKTY  
 Hore\_15960/1-115 PQLKAIVEHNRD EIEHAMCMGLEWIRRRS . . . . . PAWHENLKKF  
 Tpet\_0143/1-114 ETVRKILEHNRD EMEHAMLLEWIRRRS . . . . . PGWDEALRTY  
 Tmari\_0787/1-114 ETVRKILEHNRD EMEHAMLLEWIRRRS . . . . . PGWDEALRTY  
 Tbd\_2465/1-100 PELKAILAHNRD EKEHAMVLEWIRRRD . . . . . PCFSEQLKDY  
 Achr\_1378/1-102 PELKAILAHNRD EKEHAMVLEWIRRRD . . . . . PKFSGELKAY  
 PGLC\_13910/1-99 TELKAILAHNRD EKEHAMVLEWIRRRD . . . . . PKFSGELKAY  
 Tgt\_0837/1-101 EELKAILAHNRD EKEHAMVLEWIRRRD . . . . . KTFDKELDY  
 CYCME\_0127/1-95 EELKAILAHNRD EKEHAMVLEWIRRRD . . . . . PRMDKELDY  
 Q91\_0125/1-95 EELKAILAHNRD EKEHAMVLEWIRRRD . . . . . PRMDKELDY  
 Nmull\_22196/1-96 EELKAILAHNRD EKEHAMVLEWIRRRD . . . . . PVFSTEIRDY  
 cce\_0034/1-96 KELKAILAHNRD EKEHAMLLEWIRRRD . . . . . SVFDEELKDY  
 Metme\_0971/1-95 PELKAILAHNRD EKEHAMVLEWIRRRD . . . . . PKFDHELRYD  
 MEALZ\_1148/1-94 KDLKAILAHNRD EKEHAMLLEWIRRRD . . . . . PKFDHELRYD  
 AAY24\_01205/1-95 PELKAILAHNRD EKEHAMVLEWIRRRD . . . . . PTFDHELKDY  
 IMCC21906\_01077/1-95 PELKRILEHNRD EKEHAMMTLEWIRRRD . . . . . PVFNDEKDY  
 Sta7437\_0684/1-95 SELKAILSHNRD EKEHAMLLEWIRRRD . . . . . PTFDKELDY  
 GU3\_08795/1-95 PELKAILKHNRD EKEHAMVLEWIRRRD . . . . . PTFDKELDY  
 MARPU\_03990/1-95 DELRAILAHNRD EKEHAMVLEWIRRRD . . . . . PTFDKELDY  
 Thivi\_3051/1-95 ADLQAILAHNRD EKEHAMVLEWIRRRD . . . . . PTFDKELDY  
 THII\_2135/1-95 AELKAILAHNRD EKEHAMVLEWIRRRD . . . . . PAFDKELDY  
 NE0167/1-95 KELKAILAHNRD EKEHAMLLEWIRRRD . . . . . PAFDKELDY  
 Kkor\_0109/1-94 NDLRKILRHNRD EKEHAMVLEWIRRRD . . . . . PAFDQELKDY  
 M911\_12845/1-94 AELRSILOHNRD EKEHAMVLEWIRRRD . . . . . PVFDKELRDW  
 consensus>70 . . . . . e.l.

H57  
 E62 H65  
 E61 E64

BmBfr\_3FVB/1-182

α3

000000...0000000000...00000 0000000000...0000

120 130 140

BmBfr\_3FVB/1-182 LKGEYDA... RASY KESR E... ICDKLGDYVSK QLF... ELL

Rru\_A2195/1-159 LALELAA... RDTL VEGV A... EAFAAQDFVSR QILD... EIL

EcBfr\_3ELJ/1-158 LALELDG... AKNL REAI G... YADSVHDYVSR DMMI... EIL

EcBfr\_1BFR/1-158 LALELDG... AKNL REAI G... YADSVHDYVSR DMMI... EIL

S7J5C3/1-158 LKLELSA... IPDL RDAI A... YAEDIRDYVSR DLFO... DIL

A0A0Q2MUZ5/1-158 LKLELAA... IPDL RDAI A... YAEDIRDYVSR DLFO... DIL

Q21HY7/1-157 LKLELMA... IPDL RDGI E... YAESVRDYISR DLLE... SIL

A0A0F7M3H2/1-159 LKLELKA... VPDL KDGI K... HCESVADYVSR DLLE... EIL

A0A0P1J4Y2/1-159 LKLEHLA... VPDL REAM A... YCESVQDYVSR DLFR... RIL

A0A0C5VE25/1-156 LKLEENMA... VPVL REAI A... YCESVQDYVSR DLLE... DIL

A0A0J6N4T8/1-158 LKLEMDA... LPVL REAI A... YCESAKDYVTR DLLE... DIL

A0A0B7DEZ0/1-157 LRLEKTE... HADL KAAI A... HCESVGDYVSR ELLE... DIL

AvBfr\_1SOF/1-156 LKLEQAG... LPDL KAAI A... YCESVGDYASR ELLE... DIL

C1DQU9/1-156 LKLEQAG... LPDL KAAI A... YCESVGDYASR ELLE... DIL

A0A0C2S8V2/1-156 LKLEQSG... IADD KVAI A... YCESVGDYASR ELLE... DIL

PaFtn\_3R2M/1-154 LKLEHRV... RAAL AKGI A... LCEQHKDFVSR DILKA... QLA

Rru\_A3474/1-161 LDTERTV... VTNL RRVK K... LCEAEKDYVTR QALLP... LLN

PmFtn\_4ITW/1-168 LLELQAN... TRSL LNLA E... AASTCHDFAVM AFLN... PFH

MsLF\_1H96/1-182 LAMEKNL... NQAL LDLH A... LGSARADPHLC DFLES... HYL

Q5R538/1-175 MALEKKL... NQAL LDLH A... LGSARTDPHLC DFLET... HFL

G3R8I9/1-175 MALEKKL... NQAL LDLH A... LGSARTDPHLC DFLET... HFL

HuLF\_2FG4/1-174 MALEKKL... NQAL LDLH A... LGSARTDPHLC DFLET... HFL

E3VX58/1-175 MALEKNL... NQAL LDLH A... LGSARTDPHLC DFLEN... HFL

Q9JKM8/1-175 LTLKSL... NQAL LDLH A... LGSARTDPHLC DFLEN... HFL

L8KH0/1-175 LLVEKNI... NQAL LDLH G... LASARGDPHLC DFLEN... HFL

B6VQ1/1-175 LKMEKNL... NEAL LDLH A... LACARADPHLC DFLES... HFL

FgMF\_3RGD/1-176 LQLEKTV... NQAL LDLH K... LATDKVDPHLC DFLES... EYL

Q6P8C6/1-176 LQLEKTV... NQAL LDLH K... LASDKTDPHLC DFLES... EYL

P85837/1-174 LQLEKNV... NQSL LDLH K... VCSEHNDPHMC DFLET... HYL

P49947/1-176 LQLEKNV... NQAL LDLH K... IASDKVDPHLC DFLET... HYL

HuMF\_1R03/1-182 LLLLEKNV... NQSL LELH A... LASDKGDPHLC DFLET... YYL

HuHF\_2FHA/1-183 LHLLEKNV... NQSL LELH K... LATDKNDPHLC DFLET... HYL

MsHF\_3WNW/1-212 LHLEKSV... NQSL LELH K... LATDKNDPHLC DFLET... YYL

PgFtn/1-160 YEHECKV... TEMI EAVV R... AASEAGDMASQ DFFW... KYI

EcFtn\_1EUM/1-160 YKHEQLI... TQKI NELA H... AAMTNQDYPTF NFLQ... WYV

CjFtn\_1KRQ/1-167 YEHEQFI... TKSI NTLV E... HMLTHKDYSTF NFLQ... WYV

HpFtn\_3EGM/1-181 YEHEQHI... SESI NNIV D... HAIKSKDHATF NFLQ... WYV

PfFtn\_2JD7/1-174 YEHEKFI... SKSI YELA A... LAEEKDYSTR AFLE... WFI

A0A0C7P5L5/1-169 IEGENFE... VQEM YPVYNN... AAKFQENEAAR RTH... FAL

A0A075WM99/1-170 IEGEYSY... VEEM YPVFNN... AAKFQGESEAE KSTY... YAL

F8AEI6/1-171 IEGEYTY... VEEM YPVFKN... TAELQGEKEAV RSTH... YAL

A0A100XZC0/1-171 IEGEYTY... VEEM YPVFKN... AAEFQGEKDAV RTH... YAL

Q5JF11/1-171 IEGEYTY... VEEM YPVYKN... SAEFQGEKDAV RTH... YAL

Q9V0A0/1-175 IEGEYTY... VEEM YPVFKN... TAEFQGEKDAV RTH... FAL

B9KAX2/1-176 IEGEYTY... VEEM YPVYNT... VAEFQGEKDAV RSTK... FAW

Pf\_rubrerythrin\_3MPS/1-130 IEGEYTY... VEEM YPVYKN... AAEFQGEKEAV RTH... YAL

Dv\_rubrerythrin\_1LKM/1-144 IEGEYTY... VEEM YPVYKN... AAEFQGEKEAV RTH... YAL

St\_sulerythrin\_1J30/1-144 IEGEYTY... VEEM YPVYKN... AAEFQGEKEAV RTH... YAL

Bp\_rubrerythrin\_4DIO/1-144 IEGEYTY... VEEM YPVYKN... AAEFQGEKEAV RTH... YAL

CjDps\_3KWO/1-152 KQDYEYL... LAEF KKLN E... AAEKESDITTA NFAQ... ENI

BbDps\_1NIQ/1-149 VNDVFDL... VGEL KVAR D... VADEADDEATA DMLD... AIE

A0A0MIQIG0/1-146 VSDFEFM... IEEL KEGM K... IADEVGDDETTG DMLL... GIH

I0BUW7/1-146 VSDFEFM... IEEL KEGM K... IADEVGDDETTG DMLL... GIH

A0A132BNU7/1-145 YDDFTVI... AEEL KSGM D... LADEVGDDETTG DMLL... AIH

Q65FU7/1-145 YDDFTVI... AEEL KSGM D... LADEVGDDETTG DMLL... AIH

D5TXF7/1-147 VNDYFSL... IQEL KEGM E... VAGEAGDETTG DMLL... AIH

A0A0NOY8R5/1-151 ITDFNTL... VDEL KQGI E... IADQAGDETTG DMLT... HIR

LmDps\_2IY4/1-156 VGTLELL... RDEY QQGI E... LTDKEGDNVTN DMLI... AFK

SsDps\_2XJM/1-165 VEVEFRYL... AALF QKGF D... VSDEEGDSVTN DIFN... VAK

SsDps\_2UX1/1-165 VEVEFRYL... AALF QKGF D... VSDEEGDSVTN DIFN... VAK

EcDps\_1L8H/1-167 ADRYAIV... ANDV RKAI... GEAKDDDTA DILT... AAS

AtDps\_109R/1-162 IERYGEV... ANMI RKAI D... DSDEAGDPPTA DIFT... AAS

MsDps\_1UVH/1-183 DLVYNGV... IEDT RRSI... EKLEDDLVSQ DLLI... AHA

Rru\_A1499/1-187 AASLAAF... GHSL REAI R... QAVSIDDAPTA HLFI... ELS

MsDps/1-161 TRINAT... VDTI RRVH... DAVDAEDPSTA DLLH... GLI

Rru\_A0333/1-158 ARDOEAV... TRTA RSIF P... VADEAADEPTA DLLT... QRM

Cp\_symerythrin\_3QHC/1-179 LEVETIE... SQKT YPAFAK... LAEQGNMEVA TAFE... AIV

STaur\_4074/1-157 IAPGHFQKVL SAPPAPASPSPAP... AGFEQTRAPPVPEISHLPPQRVVYGVVPPAP PST

MXAN\_3557/1-164 FVPGHFQ... AAEAPAPATVH VPTDGPAPFASVNGRNGRLPE PPTS LPPQRLLYGLPAPPAPV

MXAN\_4464/1-116 VEKYRLI... TSGA SHEAVE... AVGKEGAAPS... PA... DVT

MXAN\_2410/1-109 AEAPRLA... RGSAL DELH E... AAP... FA... DVT

Cthe\_1503/1-119 EQEVKEM... LEQL... NITPK... PLS

Tlet\_1919/1-116 AKEVEM... LEQL... NITPK... MVE

Mboo\_1094/1-124 TLEVDTL... AGQIGAAGAA... APV

PF1192/1-96 FEEVQGA... TGI E... A... PLS

PFC\_05175short/1-99 FEEVKEL... TGI E... A... PLS

Hoch\_3836/1-131 LFTTERPI... LEL EEEDTG... SSSVVAASPT... SAP

Rru\_A0973/1-140 LFTTEGPI... TAI EAADTA... GEGSGGDAKAG... ATAQ

FRAAL4504/1-136 LFTSGPV... TEV EEETMD... R... GSGGDPDAVTE... RQAGP

Sce5279/1-127 LNSQGPI... TEV EAEE... EAAKLGATAKT... GAMA

WS0286/1-124 LFKKEGI... ISH EQAFTG... KTGEVASALG... GAMA

Amet\_4422/1-120 LFTTSGSI... LEA EMGA... ETGTETETVV... GAMA

Hore\_15960/1-115 LFSEGDI... ASL EEEE... ENQENTETTD... GAMA

Tpet\_0143/1-114 LFTDKPI... TEI EET... SGGSENT... GAMA

Tmari\_0787/1-114 LFTDKPI... TEI EET... SGGSENT... GAMA

Tbd\_2465/1-100 LFTDKAI... A... HEAKKD... S... GAMA

Achr\_1378/1-102 LFRGPI... N... HEDDAQ... ASG... GAMA

PG1C\_13910/1-99 LFTTKTI... A... HRPDDA... ASG... GAMA

Tgr7\_0837/1-101 LFTDKPI... A... GLEHEHKG... S... GAMA

CYME\_0127/1-95 LFTDKPI... A... HK... S... GAMA

Q91\_0125/1-95 LFTDKPI... A... HK... S... GAMA

Nmul\_A2196/1-96 LFTDKPI... A... HES... S... GAMA

cce\_0034/1-96 LFTDKPI... A... HES... S... GAMA

Metme\_0971/1-95 LFTDKPI... A... HES... S... GAMA

MEALZ\_1148/1-94 LFTDKPI... A... H... S... GAMA

AAZ24\_01205/1-95 LFTDKPI... A... HE... S... GAMA

IMCC21906\_01077/1-95 LFTDKPI... A... HK... S... GAMA

Sta7437\_0684/1-95 LFTSQPI... A... HK... S... GAMA

GU3\_08795/1-95 LFTSGPI... G... HH... S... GAMA

MARPU\_03990/1-95 LFTSQPI... A... HH... S... GAMA

Thivi\_3051/1-95 LFTDKVI... A... HH... S... GAMA

THII\_2135/1-95 LFTNKSI... A... HE... S... GAMA

NE0167/1-95 LFTNKPI... A... HE... S... GAMA

Kkor\_0109/1-94 LFTDEI... G... H... S... GAMA

M911\_12845/1-94 LFTDKKL... D... H... S... GAMA

consensus>70



Amino acid sequences of ferritin family proteins were aligned progressively using EMBL-EBI web services<sup>1,2</sup> Clustal Omega<sup>3</sup>, T-Coffee<sup>4</sup> and MAFFT<sup>5</sup>. Protein names were adapted from either UniprotKB<sup>6</sup>, KEGG<sup>7</sup> database or common name with PDB entry code<sup>8</sup>. Sequences were sorted in an order corresponding to the clades in phylogenetic tree (Figure 13). The alignment was edited by Esript 3.0 web server<sup>9</sup>. The *Rhodospirillum rubrum* EncFtn (Rru\_A0973) sequence was highlighted in yellow. The ferroxidase centre (FOC) of *Pseudo-nitzschia multiseriata* ferritin (PmFtn\_4ITW) (highlighting in blue) consists of Fe<sub>A</sub> site (E16, E49, E52) and Fe<sub>B</sub> site (E49, E95, E131, Q128) which were labelled with solid red triangles<sup>10</sup>. Another iron binding site in PmFtn\_4ITW (the gateway site or Fe<sub>C</sub> site<sup>11</sup>) consisted of E48, E45 and E131 which are marked with solid blue circles<sup>10</sup>. The FOC of *R. rubrum* EncFtn was labelled with empty red triangles as E32, E62, H65 and Y39; and the iron entry site was marked with empty blue circles including E31 and E34. The putative iron exit site was marked with empty blue squares including H57, E61 and E64. The C-terminal localization sequences common to the encapsulin associated ferritins were highlighted within the red rectangle.

## References

1. Li, W. *et al.* The EMBL-EBI bioinformatics web and programmatic tools framework. *Nucleic Acids Res.* **43**, W580–4 (2015).
2. McWilliam, H. *et al.* Analysis Tool Web Services from the EMBL-EBI. *Nucleic Acids Res.* **41**, (2013).
3. Sievers, F. *et al.* Fast, scalable generation of high-quality protein multiple sequence alignments using Clustal Omega. *Mol. Syst. Biol.* **7**, 539 (2011).
4. Notredame, C., Higgins, D. G. & Heringa, J. T-Coffee: A novel method for fast and accurate multiple sequence alignment. *J. Mol. Biol.* **302**, 205–17 (2000).
5. Katoh, K. & Standley, D. M. MAFFT multiple sequence alignment software version 7: Improvements in performance and usability. *Mol. Biol. Evol.* **30**, 772–780 (2013).
6. The UniProt Consortium. UniProt: a hub for protein information. *Nucleic Acids Res.* **43**, D204–12 (2014).
7. Ogata, H. *et al.* KEGG: Kyoto encyclopedia of genes and genomes. *Nucleic Acids Research* **27**, 29–34 (1999).
8. Berman, H. M. *et al.* The Protein Data Bank. *Nucleic Acids Res.* **28**, 235–242 (2000).
9. Robert, X. & Gouet, P. Deciphering key features in protein structures with the new ENDscript server. *Nucleic Acids Res.* **42**, (2014).
10. Pfaffen, S., Abdulqadir, R., Le Brun, N. E. & Murphy, M. E. P. Mechanism of ferrous iron binding and oxidation by ferritin from a pennate diatom. *J. Biol. Chem.* **288**, 14917–25 (2013).
11. Ebrahimi, K. H. Unity in the Biochemistry of the Iron-Storage Proteins Ferritin and Bacterioferritin. *Chem. Rev.* (2014).
